# Supplementary material for: Hyperthermia intravesical chemotherapy acts as a promising alternative to bacillus Calmette–Guérin instillation in non-muscle-invasive bladder cancer: a network meta-analysis
Source: PubMed Central journal article supplement (PMC10213538; doi:10.3389/fonc.2023.1164932), 2023-05-12

## A. Risk of bias figures

| Unique ID       | Experimental | Comparator | Outcome  | Weight | Randomization process | Deviations from intended inter | Missing outcome data | Measurement of the outcome | Selection of the reported result | Overall |   |
|-----------------|--------------|------------|----------|--------|-----------------------|--------------------------------|----------------------|----------------------------|----------------------------------|---------|---|
| 1-Tom2016       | HIVEC        | BCG        | RFS      | 1      | +                     | ?                              | +                    | +                          | +                                | !       | + |
| 1-Wei2019       | HIVEC        | BCG        | RFS      | 1      | +                     | +                              | +                    | +                          | +                                | +       | + |
| 1-Guerrero2023  | HIVEC        | BCG        | RFS, PFS | 1      | +                     | +                              | +                    | +                          | +                                | +       | + |
| 2-Colombo2010   | HIVEC        | MMC        | RFS      | 1      | +                     | +                              | +                    | +                          | +                                | +       | + |
| 2-Wei2023       | HIVEC        | MMC        | RFS, PFS | 1      | +                     | +                              | +                    | +                          | +                                | +       | + |
| 3-Rintala1991   | BCG          | MMC        | RFS      | 1      | +                     | ?                              | +                    | +                          | +                                | !       | + |
| 3-J. A. 1998    | BCG          | MMC        | RFS, PFS | 1      | +                     | +                              | +                    | +                          | +                                | +       | + |
| 3-Friedrich2007 | BCG          | MMC        | RFS      | 1      | +                     | +                              | +                    | +                          | +                                | +       | + |
| 3-Gårdmark2007  | BCG          | MMC        | PFS      | 1      | +                     | +                              | +                    | +                          | +                                | +       | + |
| 3-Ojea2007      | BCG          | MMC        | RFS, PFS | 1      | +                     | +                              | +                    | +                          | +                                | +       | + |
| 3-Isbarn2008    | BCG          | MMC        | RFS      | 1      | +                     | +                              | +                    | +                          | +                                | +       | + |
| 5-Nijjima1983   | MMC          | TURB       | RFS      | 1      | +                     | +                              | +                    | +                          | +                                | +       | + |
| 5-Tsushima1987  | MMC          | TURB       | RFS      | 1      | +                     | +                              | +                    | +                          | +                                | +       | + |
| 4-Yamamoto1990  | BCG          | TURB       | RFS      | 1      | +                     | +                              | +                    | +                          | +                                | +       | + |
| 3-S. KREGE1996  | BCG, MMC     | TURB       | RFS      | 1      | +                     | +                              | +                    | +                          | +                                | +       | + |
| 5-SAKAMOTO2001  | MMC          | TURB       | RFS      | 1      | +                     | +                              | +                    | +                          | +                                | +       | + |
| 5-De Nunzio2011 | MMC          | TURB       | RFS      | 1      | +                     | +                              | +                    | +                          | +                                | +       | + |
| 5-Akaza1987     | MMC          | TURB       | RFS      | 1      | +                     | +                              | +                    | +                          | +                                | +       | + |
| 5-HYEON1989     | MMC          | TURB       | RFS, PFS | 1      | +                     | +                              | +                    | +                          | +                                | +       | + |
| 4-FRANCESCO1991 | BCG          | TURB       | RFS, PFS | 1      | +                     | +                              | +                    | +                          | +                                | +       | + |
| 4-Melekos1993   | BCG          | TURB       | RFS, PFS | 1      | +                     | +                              | +                    | +                          | +                                | +       | + |
| 3-PETER1995     | BCG1,2       | MMC        | RFS, PFS | 1      | +                     | +                              | +                    | +                          | +                                | +       | + |
| 4-Harry1995     | BCG          | TURB       | RFS, PFS | 1      | +                     | !                              | +                    | +                          | +                                | !       | ! |
| 3-Donald1995    | BCG          | MMC        | RFS, PFS | 1      | +                     | +                              | +                    | +                          | +                                | +       | + |
| 5-TOLLEY1996    | MMC          | TURB       | RFS, PFS | 1      | +                     | +                              | +                    | +                          | +                                | +       | + |
| 3-PER-UNO1999   | BCG          | MMC        | RFS      | 1      | +                     | +                              | +                    | +                          | +                                | +       | + |
| 3-Barbara2008   | BCG          | MMC        | RFS      | 1      | +                     | +                              | +                    | +                          | +                                | +       | + |
| 3-Riikka2009    | BCG          | MMC        | RFS, PFS | 1      | +                     | +                              | +                    | +                          | +                                | +       | + |
| 2-Angulo2023    | HIVEC        | MMC        | RFS      | 1      | +                     | +                              | +                    | +                          | +                                | +       | + |
| 4-Herr1997      | BCG          | TURB       | PFS      | 1      | +                     | +                              | +                    | +                          | +                                | +       | + |
| 4-Iamm1980      | MMC          | TURB       | RFS      | 1      | +                     | +                              | +                    | +                          | +                                | +       | + |
| 3-J.A1993       | BCG          | MMC        | RFS      | 1      | +                     | +                              | +                    | +                          | +                                | +       | + |
| 3-lundholm1996  | BCG          | MMC        | RFS      | 1      | +                     | +                              | +                    | +                          | +                                | +       | + |
| 3-Geert1998     | BCG          | MMC        | RFS, PFS | 1      | +                     | +                              | +                    | +                          | +                                | +       | + |

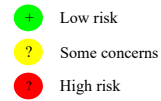

## B. Risk of bias graph

|                            | Randomization process | Deviations from intended interventions | Missing outcome data | Measurement of the outcome | Selection of the reported result | Overall Bias |
|----------------------------|-----------------------|----------------------------------------|----------------------|----------------------------|----------------------------------|--------------|
| Total number of study = 34 |                       |                                        |                      |                            |                                  |              |
| Low risk                   | 100                   | 91.2                                   | 100                  | 100                        | 100                              | 91.2         |
| Some concerns              | 0                     | 5.9                                    | 0                    | 0                          | 0                                | 5.9          |
| High risk                  | 0                     | 2.9                                    | 0                    | 0                          | 0                                | 2.9          |

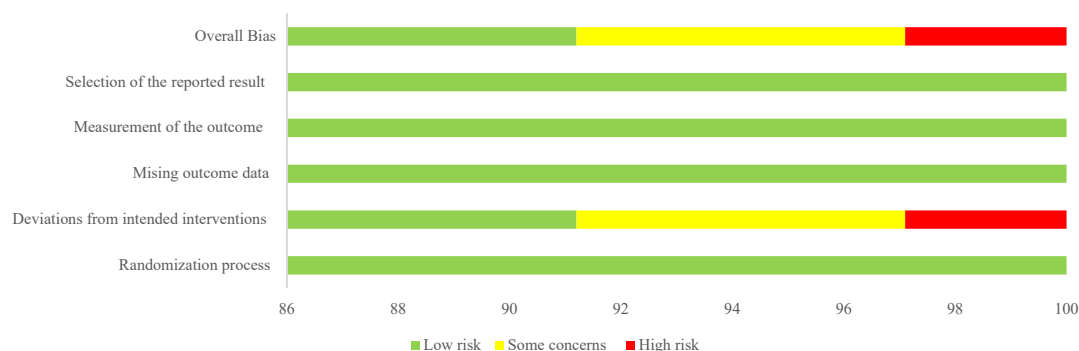

Supplement: DataSheet_1.pdf [file DataSheet_1.pdf]
