# Supplementary material for: Hyperthermia intravesical chemotherapy acts as a promising alternative to bacillus Calmette–Guérin instillation in non-muscle-invasive bladder cancer: a network meta-analysis
Source: PubMed Central journal article supplement (PMC10213538; doi:10.3389/fonc.2023.1164932), 2023-05-12

A. Consistency check for HR of RFS

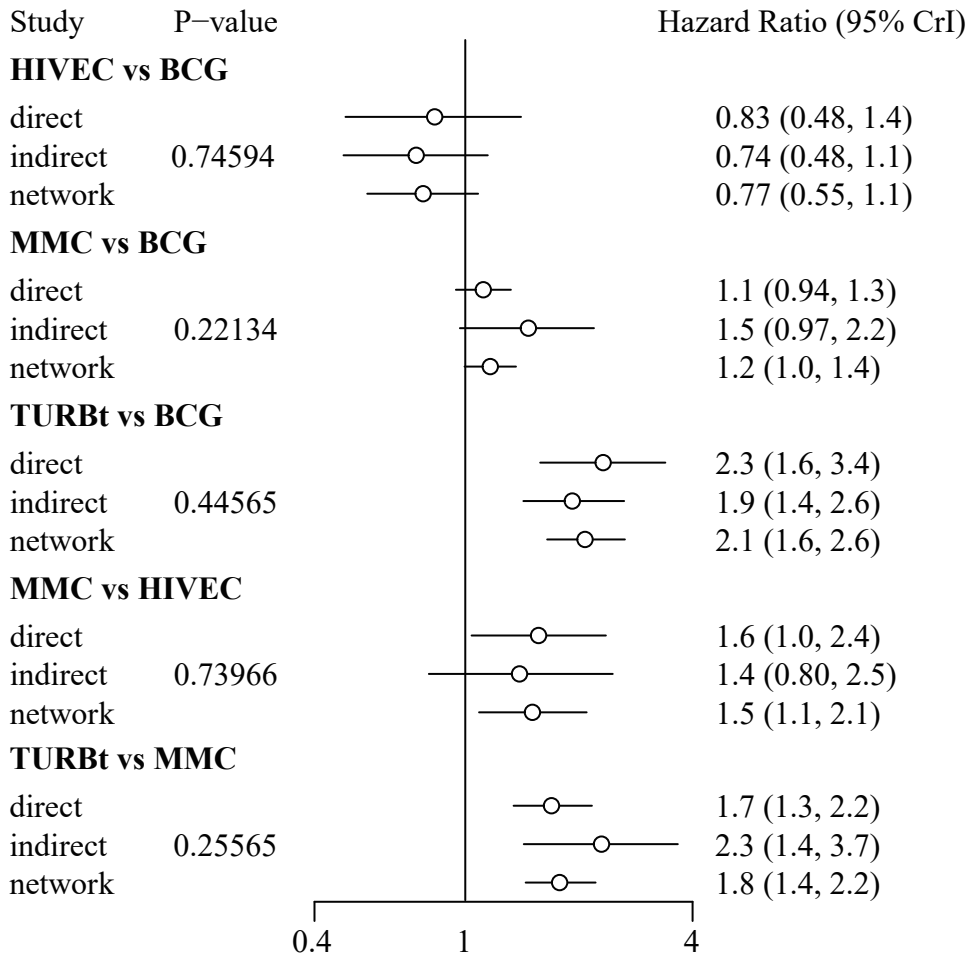

B. Consistency check for HR of PFS

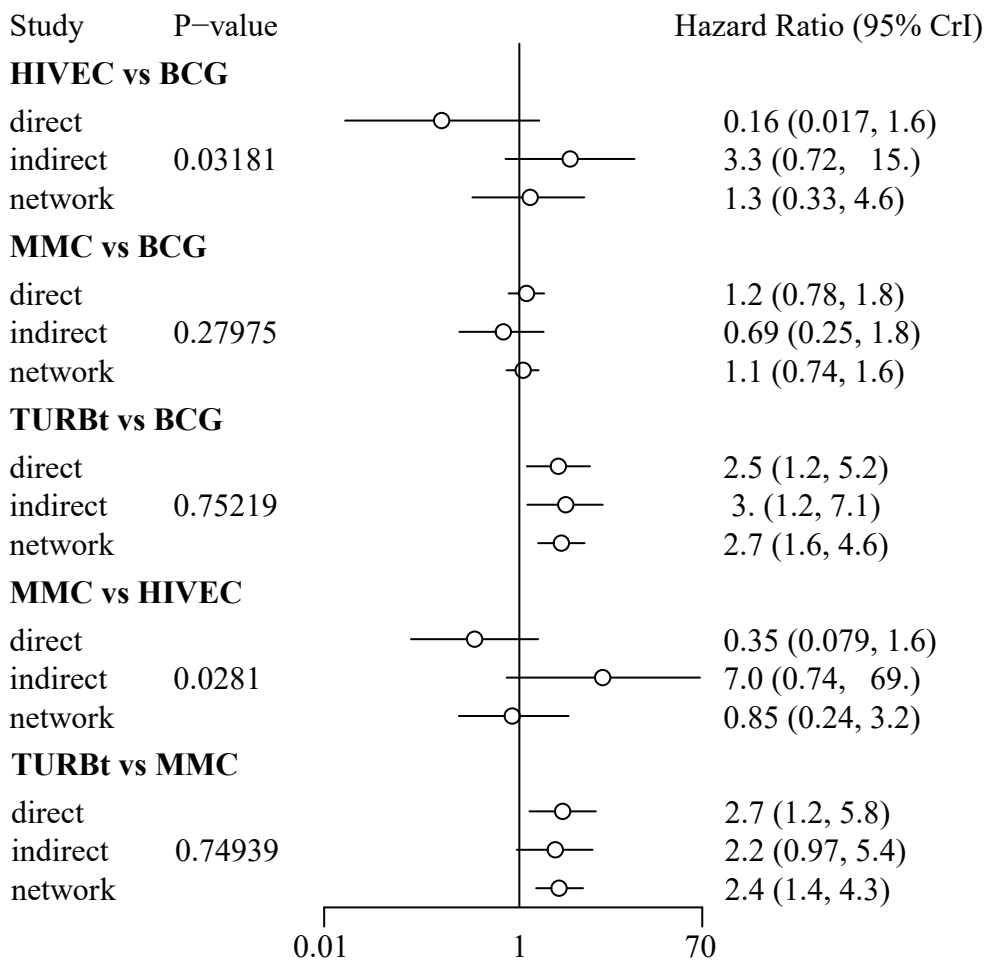

Supplement: DataSheet_3.pdf [file DataSheet_3.pdf]
