# Supplementary material for: Hyperthermia intravesical chemotherapy acts as a promising alternative to bacillus Calmette–Guérin instillation in non-muscle-invasive bladder cancer: a network meta-analysis
Source: PubMed Central journal article supplement (PMC10213538; doi:10.3389/fonc.2023.1164932), 2023-05-12
Supplement: DataSheet_5.pdf [file DataSheet_5.pdf]

## Part 1: HIVEC versus BCG or MMC

### 1.1 Search terms in PubMed

| PubMed | Search terms                                                                                                                                                                                                                                                                                                                                                                                                                                                                                                                                                                                                                                                                                                                                                                                                 | results |
|--------|--------------------------------------------------------------------------------------------------------------------------------------------------------------------------------------------------------------------------------------------------------------------------------------------------------------------------------------------------------------------------------------------------------------------------------------------------------------------------------------------------------------------------------------------------------------------------------------------------------------------------------------------------------------------------------------------------------------------------------------------------------------------------------------------------------------|---------|
| 1      | ((((((((((((((((Neoplasm, Urinary Bladder[Title/Abstract]) OR (Urinary Bladder Neoplasm[Title/Abstract])) OR (Bladder Tumors[Title/Abstract])) OR (Bladder Tumor[Title/Abstract]) OR (Tumor, Bladder[Title/Abstract]) OR (Tumors, Bladder[Title/Abstract]) OR (Neoplasms, Bladder[Title/Abstract]) OR (Bladder Neoplasms[Title/Abstract]) OR (Bladder Neoplasm[Title/Abstract]) OR (Neoplasm, Bladder[Title/Abstract]) OR (Urinary Bladder Cancer[Title/Abstract]) OR (Cancer, Urinary Bladder[Title/Abstract]) OR (Malignant Tumor of Urinary Bladder[Title/Abstract]) OR (Cancer of the Bladder[Title/Abstract]) OR (Bladder Cancer[Title/Abstract]) OR (Bladder Cancers[Title/Abstract]) OR (Cancer, Bladder[Title/Abstract]) OR (Cancer of Bladder[Title/Abstract]) OR (bladder cancer[Title/Abstract])) | 50349   |
| 2      | HIVEC[Title/Abstract]                                                                                                                                                                                                                                                                                                                                                                                                                                                                                                                                                                                                                                                                                                                                                                                        | 36      |
| 3      | (#1) AND (#2)                                                                                                                                                                                                                                                                                                                                                                                                                                                                                                                                                                                                                                                                                                                                                                                                | 31      |
| 4      | (((((CHT[Title/Abstract]) OR (chemohyperthermia[Title/Abstract]) OR (Thermochemotherapy[Title/Abstract])) OR device-assisted Therapy                                                                                                                                                                                                                                                                                                                                                                                                                                                                                                                                                                                                                                                                         | 2666    |
| 5      | ((((((((Therapy, Fever) OR (Hyperthermia, Therapeutic)) OR (Induced Hyperthermia)) OR (Therapeutic Hyperthermia)) OR (Thermotherapy)) OR (Fever Therapy)) OR (Hyperthermia, Local)) OR (Local Hyperthermia)                                                                                                                                                                                                                                                                                                                                                                                                                                                                                                                                                                                                  | 125804  |
| 6      | ((((((((Therapy, Drug) OR (Drug Therapies)) OR (Therapies, Drug)) OR (Chemotherapy)) OR (Chemotherapies)) OR (Pharmacotherapy)) OR (Pharmacotherapies)                                                                                                                                                                                                                                                                                                                                                                                                                                                                                                                                                                                                                                                       | 3890987 |
| 7      | (#5) AND (#6)                                                                                                                                                                                                                                                                                                                                                                                                                                                                                                                                                                                                                                                                                                                                                                                                | 65846   |
| 8      | (#4) OR (#7)                                                                                                                                                                                                                                                                                                                                                                                                                                                                                                                                                                                                                                                                                                                                                                                                 | 68257   |
| 9      | (#1) AND (#8)                                                                                                                                                                                                                                                                                                                                                                                                                                                                                                                                                                                                                                                                                                                                                                                                | 452     |
| 10     | (#3) OR (#9)                                                                                                                                                                                                                                                                                                                                                                                                                                                                                                                                                                                                                                                                                                                                                                                                 | 457     |
| 11     | (#3) OR (#9) AND (randomizedcontrolledtrial[Filter])                                                                                                                                                                                                                                                                                                                                                                                                                                                                                                                                                                                                                                                                                                                                                         | 31      |

### 1.2 Search terms in Ovid

All Ovid Journals (Abstracts Only)

Huazhong Univ Sci & Technol Full Text Journals(LWW+ADIS)

Embase <1974 to 2023 January 09>

Books@Ovid <December 27, 2022>

Ovid MEDLINE(R) ALL <1946 to January 09, 2023>

- 1 bladder cancer/ or bladder tumor/ or bladder carcinogenesis/ or bladder carcinoma/ or bladder metastasis/ or muscle invasive bladder cancer/ or non muscle invasive bladder cancer/ 162324
- 2 HIVEC.ab,kw,ti. 112
- 3 1 and 2 73
- 4 CHT.ab,kw,ti. 6211
- 5 chemohyperthermia.ab,kw,ti. 477
- 6 Thermo-chemotherapy.ab,kw,ti. 366
- 7 device-assisted therapy.ab,kw,ti. 68
- 8 4 or 5 or 6 or 77058
- 9 adjuvant chemotherapy/ or chemotherapy/ 292458
- 10 microwave thermotherapy/ or thermotherapy/ 30673
- 11 hyperthermia/ 24378
- 12 10 or 11 54711
- 13 9 and 12 1323
- 14 1 and 13 61
- 15 3 or 14 131
- 16 clinical trial/ or controlled clinical trial/ or randomized controlled trial/ or controlled study/ 10835564
- 17 15 and 1645

### 1.3 Search terms in Cochrane Library

- #1 MeSH descriptor: [Urinary Bladder Neoplasms] explode all trees 1645
  - #2 HIVEC 19
  - #3 Hyperthermia Intravesical Chemotherapy 19
  - #4 #2 OR #3 33
  - #5 #1 AND #4 13
  - #6 CHT 254
  - #7 chemohyperthermia 40
  - #8 Thermo-chemotherapy 8
  - #9 device-assisted therapy 33
  - #10 #6 OR #7 OR #8 OR #9 332
  - #11 MeSH descriptor: [Drug Therapy] explode all trees 148743
  - #12 MeSH descriptor: [Hyperthermia, Induced] explode all trees 1845
  - #13 #11 OR #12 300
  - #14 #10 OR #13 629
  - #15 #1 AND #14 15
  - #16 #5 OR #15 17
- Filter: Trials - 15

## Part 2: BCG versus MMC versus TURB

### 2.1 Search terms in PubMed

| PubMed | Search terms | results |
|--------|--------------|---------|
|--------|--------------|---------|

|   |                                                                                                                                                                                                                                                                                                                                                                                                                                                                                                                                                                                                                                                                                                                                                                                                                              |       |
|---|------------------------------------------------------------------------------------------------------------------------------------------------------------------------------------------------------------------------------------------------------------------------------------------------------------------------------------------------------------------------------------------------------------------------------------------------------------------------------------------------------------------------------------------------------------------------------------------------------------------------------------------------------------------------------------------------------------------------------------------------------------------------------------------------------------------------------|-------|
| 1 | ((((((((((((((((((Neoplasm, Urinary Bladder[Title/Abstract]) OR (Urinary Bladder Neoplasm[Title/Abstract])) OR (Bladder Tumors[Title/Abstract])) OR (Bladder Tumor[Title/Abstract])) OR (Tumor, Bladder[Title/Abstract])) OR (Tumors, Bladder[Title/Abstract])) OR (Neoplasms, Bladder[Title/Abstract])) OR (Bladder Neoplasms[Title/Abstract])) OR (Bladder Neoplasm[Title/Abstract])) OR (Neoplasm, Bladder[Title/Abstract])) OR (Urinary Bladder Cancer[Title/Abstract])) OR (Cancer, Urinary Bladder[Title/Abstract])) OR (Malignant Tumor of Urinary Bladder[Title/Abstract])) OR (Cancer of the Bladder[Title/Abstract])) OR (Bladder Cancer[Title/Abstract])) OR (Bladder Cancers[Title/Abstract])) OR (Cancer, Bladder[Title/Abstract])) OR (Cancer of Bladder[Title/Abstract])) OR (bladder cancer[Title/Abstract]) | 50349 |
| 2 | ((((((((((((((((((mitomycin C[Title/Abstract]) OR (Mitomycin C[Title/Abstract])) OR (Mitomycin-C[Title/Abstract])) OR (Mitocin-C[Title/Abstract])) OR (Mitocin C[Title/Abstract])) OR (MitocinC[Title/Abstract])) OR (NSC-26980[Title/Abstract])) OR (NSC 26980[Title/Abstract])) OR (NSC26980[Title/Abstract])) OR (Ametycine[Title/Abstract])) OR (Mutamycin[Title/Abstract])) OR (MMC[Title/Abstract])                                                                                                                                                                                                                                                                                                                                                                                                                    | 21120 |
| 3 | ((((((((((((((((((BCG[Title/Abstract]) OR (Vaccine, BCG[Title/Abstract])) OR (Bacillus Calmette Guerin Vaccine[Title/Abstract])) OR (Calmette's Vaccine[Title/Abstract])) OR (Calmette Vaccine[Title/Abstract])) OR (Calmettes Vaccine[Title/Abstract])) OR (Vaccine, Calmette's[Title/Abstract])) OR (Calmette Guerin Bacillus Vaccine[Title/Abstract])                                                                                                                                                                                                                                                                                                                                                                                                                                                                     | 25881 |
| 4 | (#2) OR (#3)                                                                                                                                                                                                                                                                                                                                                                                                                                                                                                                                                                                                                                                                                                                                                                                                                 | 46672 |
| 5 | (#1) AND (#4)                                                                                                                                                                                                                                                                                                                                                                                                                                                                                                                                                                                                                                                                                                                                                                                                                | 3732  |
| 6 | (#1) AND (#4) AND (randomizedcontrolledtrial[Filter])                                                                                                                                                                                                                                                                                                                                                                                                                                                                                                                                                                                                                                                                                                                                                                        | 224   |

## 2.2 Search terms in Ovid

All Ovid Journals (Abstracts Only)

Huazhong Univ Sci & Technol Full Text Journals(LWW+ADIS)

Embase <1974 to 2023 January 09>

Books@Ovid <December 27, 2022>

Ovid MEDLINE(R) ALL <1946 to January 09, 2023>

- 1 bladder cancer/ or bladder tumor/ or bladder carcinogenesis/ or bladder carcinoma/ or bladder metastasis/ or muscle invasive bladder cancer/ or non muscle invasive bladder cancer/ 162324
- 2 mitomycin/ 36444
- 3 mycobacterium bovis bcg/ 3441
- 4 2 or 3 39712
- 5 1 and 4 4224
- 6 randomized controlled trial/ 1328772
- 7 5 and 6 328

### **2.3 Search terms in Cochrane Library**

- #1 MeSH descriptor: [Urinary Bladder Neoplasms] explode all trees 1645
  - #2 MeSH descriptor: [Mitomycin] explode all trees 1210
  - #3 MeSH descriptor: [Mycobacterium bovis] explode all trees 90
  - #4 #2 OR #3 1299
  - #5 #1 AND #4 187
- Filter: Randomized Controlled Trial – 183
